# Supplementary material
Source: ML conference proceedings conference paper supplement (https://proceedings.mlr.press/v89/cohen19a.html)
Supplement: Supplementary file 1 [file cohen19a-supp.pdf]

## Appendix A Rademacher Complexity and Generalization Bounds

For completeness, we provide the proof of Theorem 1, following the approach of [Sabato et al. \(2013\)](#). We then extend it to prove Theorem 2.

To derive the sample complexity of our hypothesis classes  $\mathcal{H}_{2,0}$  and  $\mathcal{H}_{1,0}$ , we will use the Rademacher complexity. Let  $\mathcal{Z}$  be some domain. The empirical Rademacher complexity of a class of functions  $\mathcal{F} \subseteq \mathbb{R}^{\mathcal{Z}}$  with respect to a set  $S = \{\mathbf{z}_i\} \subseteq \mathcal{Z}$ , for  $1 \leq i \leq m$  is

$$\mathcal{R}(\mathcal{F}, S) = \frac{1}{m} \mathbb{E}_{\boldsymbol{\sigma}} \left[ \sup_{f \in \mathcal{F}} \sum_{i=1}^m \sigma_i f(\mathbf{z}_i) \right], \quad (1)$$

where  $\boldsymbol{\sigma} = (\sigma_1, \dots, \sigma_m)$  are  $m$  independent uniform  $\{\pm 1\}$ -valued variables. The empirical Gaussian complexity  $\mathcal{G}(\mathcal{F}, S)$  is similarly defined with the entries of  $\boldsymbol{\sigma}$  being  $m$  independent standard Gaussian random variables. The average Rademacher complexity of  $\mathcal{F}$  with respect to a distribution  $\mathcal{D}$  over  $\mathcal{Z}$  and a sample size  $m$  is

$$\mathcal{R}_m(\mathcal{F}, \mathcal{D}) = \mathbb{E}_{S \sim \mathcal{D}^m} [\mathcal{R}(\mathcal{F}, S)]. \quad (2)$$

Consider a hypothesis class  $\mathcal{H}$  and a loss function  $\ell$ . For a hypothesis  $h \in \mathcal{H}$ , let  $h_\ell : \mathcal{X} \times \{\pm 1\} \mapsto \mathbb{R}$  be defined as  $h_\ell(x, y) = \ell(y, h(x))$ . The resulting function class  $\mathcal{H}_\ell$  is  $\mathcal{H}_\ell = \{h_\ell | h \in \mathcal{H}\}$ . Assume that the range of  $\mathcal{H}_\ell$  is  $[0, 1]$ . Then, from [Mendelson \(2002\)](#), for any  $\delta \in (0, 1)$ , with probability  $1 - \delta$ , every  $h \in \mathcal{H}$  satisfies that

$$\ell(h, \mathcal{D}) \leq \ell(h, S) + 2\mathcal{R}_m(\mathcal{H}_\ell, \mathcal{D}) + \sqrt{\frac{8 \ln(2/\delta)}{m}}. \quad (3)$$

Denote the class of ramp-loss functions applied to the hypothesis class  $\mathcal{H}$  by

$$\text{RAMP} \circ \mathcal{H} = \{(\mathbf{x}, y) \mapsto \text{ramp}(h, (\mathbf{x}, y)) | h \in \mathcal{H}\}. \quad (4)$$

In addition to the empirical Rademacher complexity, we will use the notion of  $L_2$  covering numbers, defined as follows.

**Definition 1.** An  $\epsilon$ -cover of a subset  $A$  of a pseudometric space  $(S, d)$  is a set  $A'$  such that for each  $a \in A$ , there exists  $a' \in A'$  such that  $d(a, a') \leq \epsilon$ . The  $\epsilon$ -covering number of  $A$  is:

$$\mathcal{N}(\epsilon, A, d) = \min\{|A'| : A' \text{ is an } \epsilon\text{-cover of } A\}. \quad (5)$$

## Appendix B Sample Complexity

We now provide direct proofs for Theorems 1 and 2. In order to bound the Rademacher complexity of the class

$\text{RAMP}_\gamma \circ \mathcal{H}_{2,0}$ , we will first bound its covering number. To do so, we will express the functions in this class as sums of two functions with respect to  $\mathbf{w}_a$  and  $\mathbf{w}_b$ . We require the three following lemmas from [Sabato et al. \(2013\)](#), reported below for completeness.

**Lemma 1** ([Sabato et al. \(2013\)](#), Lemma 8). Let  $(\mathcal{X}, \|\cdot\|_\circ)$  be a normed space. Let  $\mathcal{F} \subseteq \mathcal{X}$  be a set, and let  $\mathcal{G} : \mathcal{X} \mapsto 2^{\mathcal{X}}$  be a mapping from objects in  $\mathcal{X}$  to sets of objects in  $\mathcal{X}$ . Assume that  $\mathcal{G}$  is  $c$ -Lipschitz with respect to the Hausdorff distance  $\Delta_H$  on sets, that is assume that

$$\forall f_1, f_2 \in \mathcal{X}, \Delta_H(\mathcal{G}(f_1), \mathcal{G}(f_2)) \leq c \|f_1 - f_2\|_\circ, \quad (6)$$

where  $\Delta_H(\mathcal{G}_1, \mathcal{G}_2) = \sup_{g_1 \in \mathcal{G}_1} \inf_{g_2 \in \mathcal{G}_2} \|g_1 - g_2\|_\circ$ . Let  $\mathcal{F}_\mathcal{G} = \{f + g | f \in \mathcal{F}, g \in \mathcal{G}(f)\}$ . Then,

$$\begin{aligned} \mathcal{N}(\epsilon, \mathcal{F}_\mathcal{G}, \circ) &\leq \\ &\mathcal{N}(\epsilon/(2+c), \mathcal{F}, \circ) \cdot \sup_{f \in \mathcal{F}} \mathcal{N}(\epsilon/(2+c), \mathcal{G}(f), \circ). \end{aligned} \quad (7)$$

**Lemma 2** ([Sabato et al. \(2013\)](#), Lemma 9). Let  $f : \mathcal{X} \mapsto \mathbb{R}$  be a function and let  $Z \subseteq \mathbb{R}^{\mathcal{X}}$  be a function class over some domain  $\mathcal{X}$ . Let  $\mathcal{G} : \mathbb{R}^{\mathcal{X}} \mapsto 2^{\mathbb{R}^{\mathcal{X}}}$  be the mapping defined by

$$\mathcal{G}(f) \triangleq \{x \mapsto \llbracket f(x) + z(x) \rrbracket - f(x) | z \in Z\}. \quad (8)$$

Then,  $\mathcal{G}$  is 1-Lipschitz with respect to the Hausdorff distance.

**Lemma 3** ([Sabato et al. \(2013\)](#), Lemma 10). Let  $f : \mathcal{X} \mapsto \mathbb{R}$  be a function and let  $Z \subseteq \mathbb{R}^{\mathcal{X}}$  be a function class over some domain  $\mathcal{X}$ . Let  $\mathcal{G}(f)$  be defined as in (8). Then, the pseudo-dimension of  $\mathcal{G}(f)$  is at most the pseudo-dimension of  $Z$ .

Our next lemma requires the definition of the notions of pseudo-shattering ([Pollard, 2012](#)) and pseudo-dimension.

**Definition 2.** Let  $\mathcal{F}$  be a set of functions  $f : \mathcal{X} \mapsto \mathbb{R}$ , and  $\gamma > 0$ . The set  $\{\mathbf{x}_a, \dots, \mathbf{x}_m\} \subseteq \mathcal{X}$  is pseudo-shattered by  $\mathcal{F}$  with the witness  $r \in \mathbb{R}^m$  if for all  $y \in \{\pm 1\}^m$  there is an  $f \in \mathcal{F}$  such that  $\forall i \in [1, \dots, m]$ ,  $y[i](f(\mathbf{x}_i) - r[i]) > 0$ .

The pseudo-dimension  $pdim$  of a hypothesis class is the size of the largest set that is pseudo-shattered by this class.

**Lemma 4.** Let  $\mathcal{H} = \{\mathbf{x} \mapsto \langle \mathbf{w}, \mathbf{x} \rangle | \|\mathbf{w}\|_0 \leq k\}$ . Then,

$$pdim(\mathcal{H}) = O(k \log d). \quad (9)$$

Equipped with these lemmas, we can now derive an upper bound on the Rademacher complexity of  $\text{RAMP} \circ \mathcal{H}_{2,0}$  in the following theorem. Theorem 1 then follows directly from Proposition 1.

**Theorem 1.** Let  $\mathcal{D}$  be a distribution over  $\mathbb{R}^d \times \{\pm 1\}$ . Assume that all samples are such that  $\|\mathbf{x}_i\|_2 \leq 1$ . Then,

$$\mathcal{R}(\text{RAMP} \circ \mathcal{H}_{2,0}, \mathcal{D}) \leq \sqrt{\frac{O(k \log d + B^2 \log^2(m))}{m}}. \quad (10)$$

*Proof.* In this proof, all absolute constants are assumed to be positive and are denoted by  $C$  or  $C_i$  for some integer  $i$ . Their values may change from line to line or even within the same line.

Note that

$$\text{ramp}(h, \mathbf{x}, y) = \llbracket 1 - y \langle \mathbf{w}, \mathbf{x} \rangle \rrbracket = 1 - \llbracket y \langle \mathbf{w}, \mathbf{x} \rangle \rrbracket \quad (11)$$

Shifting by a constant and negating do not change the covering number of a function class. Therefore,  $\mathcal{N}(\epsilon, \text{RAMP} \circ \mathcal{H}_{2,0}, L_2(S))$  is equal to the covering number of  $\{(\mathbf{x}, y) \mapsto \llbracket y \langle \mathbf{w}_a + \mathbf{w}_b, \mathbf{x} \rangle \rrbracket \mid \|\mathbf{w}_a\|_2 \leq B, \|\mathbf{w}_b\|_0 \leq k\}$ .

Define

$$\mathcal{F} = \{\mathbf{x} \mapsto y \langle \mathbf{w}_a, \mathbf{x} \rangle \mid \|\mathbf{w}_a\|_2 \leq B\}. \quad (12)$$

Let  $\mathcal{G} : \mathbb{R}^d \mapsto 2^{\mathbb{R}^d}$  be the mapping defined by:

$$\mathcal{G}(f) = \{\mathbf{x} \mapsto \llbracket f(\mathbf{x}) + y \langle \mathbf{w}_b, \mathbf{x} \rangle \rrbracket - f(\mathbf{x}) \mid \|\mathbf{w}_b\|_0 \leq k\}. \quad (13)$$

From Lemma 2,  $\mathcal{G}$  is 1-Lipschitz with respect to the Hausdorff distance. Clearly,  $\mathcal{F}_{\mathcal{G}} = \{f + g \mid f \in \mathcal{F}, g \in \mathcal{G}(f)\} = \text{RAMP} \circ \mathcal{H}_{2,0}$ . Thus, from Lemma 1, it holds that

$$\mathcal{N}(\epsilon, \text{RAMP} \circ \mathcal{H}_{2,0}, L_2(S)) \leq \mathcal{N}(\epsilon/3, \mathcal{F}, L_2(S)) \cdot \sup_{f \in \mathcal{F}} \mathcal{N}(\epsilon/3, \mathcal{G}(f), L_2(S)). \quad (14)$$

We now proceed to bound the two covering numbers on the right-hand side. First, consider  $\mathcal{N}(\epsilon/3, \mathcal{G}(f), L_2(S))$ . From Lemma 3, the pseudo-dimension of  $\mathcal{G}(f)$  is the same as the pseudo-dimension of  $\{\mathbf{x} \mapsto y \langle \mathbf{w}_b, \mathbf{x} \rangle \mid \|\mathbf{w}_b\|_0 \leq k\}$ , which is given by Lemma 4. The  $L_2$  covering number of  $\mathcal{G}(f)$  may then be bounded by its pseudo-dimension as follows (Bartlett, 2006):

$$\mathcal{N}(\epsilon/3, \mathcal{G}(f), L_2(S)) \leq 2 \left( \frac{36e}{\epsilon^2} \right)^{k \log d}. \quad (15)$$

Second, consider  $\mathcal{N}(\epsilon/3, \mathcal{F}, L_2(S))$ . From Sudakov's minoration theorem (Sudakov, 1971; Ledoux and Talagrand, 1991),

$$\ln \mathcal{N}(\epsilon/3, \mathcal{F}, L_2(S)) \leq \frac{C}{m \epsilon^2} \mathbb{E}_s^2 \left[ \sup_{f \in \mathcal{F}} \sum_{i=1}^m s_i f(\mathbf{x}_i) \right], \quad (16)$$

where  $s_i$  are independent standard normal variables. The right-hand side can be bounded as follows:

$$\begin{aligned} \mathbb{E} \left[ \sup_{f \in \mathcal{F}} \sum_{i=1}^m s_i f(\mathbf{x}_i) \right] &= \mathbb{E}_s \left[ \sup_{\mathbf{w} : \|\mathbf{w}\|_2 \leq B} y \langle \mathbf{w}, \sum_{i=1}^m s_i \mathbf{x}_i \rangle \right] \\ &\leq B \mathbb{E}_s \left[ \sqrt{\left\| \sum_{i=1}^m s_i \mathbf{x}_i \right\|_2^2} \right] \\ &\leq B \sqrt{\mathbb{E}_s \left[ \left\| \sum_{i=1}^m s_i \mathbf{x}_i \right\|_2^2 \right]} \\ &= B \sqrt{\mathbb{E}_s \left[ \left\| \sum_{i=1}^m \mathbf{x}_i \right\|_2^2 \right]} \\ &\leq B \sqrt{m}, \end{aligned}$$

where we used Jensen's inequality. Therefore, we have

$$\ln \mathcal{N}(\epsilon/3, \mathcal{F}, L_2(S)) \leq \frac{CB^2}{\epsilon^2}. \quad (17)$$

Substituting (15) and (17) in (14) and adjusting constants, we get

$$\begin{aligned} \ln \mathcal{N}(\epsilon, \text{RAMP} \circ \mathcal{H}_{2,0}, L_2(S)) &\leq \\ &C_1 \left( 1 + k \log d \ln \frac{C_2}{\epsilon} + \frac{B^2}{\epsilon^2} \right). \quad (18) \end{aligned}$$

We can now bound the Rademacher complexity of  $\text{RAMP} \circ \mathcal{H}_{2,0}$  by its  $L_2$  covering numbers. From Mendelson (2002), it holds that, for any monotone sequence  $\{\epsilon_i\}$  decreasing to 0 such that  $\epsilon_0 = 1$ ,

$$\begin{aligned} \sqrt{m} \mathcal{R}(\text{RAMP} \circ \mathcal{H}_{2,0}, S) &\leq C_1 \sum_{i=1}^N \epsilon_{i-1} \sqrt{\ln \mathcal{N}(\epsilon, \text{RAMP} \circ \mathcal{H}_{2,0}, L_2(S))} + 2\epsilon_N \sqrt{m} \\ &\leq C_1 \sum_{i=1}^N \epsilon_{i-1} \sqrt{1 + k \log d \ln \frac{C_2}{\epsilon} + \frac{B^2}{\epsilon^2}} + 2\epsilon_N \sqrt{m} \\ &\leq C_1 \sum_{i=1}^N \epsilon_{i-1} \left( 1 + \sqrt{k \log d \ln \frac{C_2}{\epsilon} + \frac{B}{\epsilon}} \right) + 2\epsilon_N \sqrt{m}, \end{aligned}$$

where we substituted (18). Let  $\epsilon_i = 2^{-i}$ . We obtain

$$\begin{aligned} \sqrt{m} \mathcal{R}(\text{RAMP} \circ \mathcal{H}_{2,0}, S) &\leq \\ &C \left( 1 + \sqrt{k \log d} + NB \right) + 2^{-N+1} \sqrt{m}. \quad (19) \end{aligned}$$

Setting  $N = \log(2m)$ , we have

$$\mathcal{R}(\text{RAMP} \circ \mathcal{H}_{2,0}, S) \leq \frac{C}{\sqrt{m}} \left( 1 + \sqrt{k \log d} + B \log(2m) \right). \quad (20)$$

Taking expectation over both sides yields

$$\begin{aligned} \mathcal{R}(\text{RAMP} \circ \mathcal{H}_{2,0}, \mathcal{D}) &\leq \frac{C}{\sqrt{m}} \left( 1 + \sqrt{k \log d} + B \log(2m) \right) \\ &\leq \sqrt{\frac{\mathcal{O}(k \log d + B^2 \log^2(2m))}{m}}. \quad (21) \end{aligned}$$

□

We can prove similarly the following theorem for the hypothesis class  $\mathcal{H}_{1,0}$ .

**Theorem 2.** *Let  $\mathcal{D}$  be a distribution over  $\mathbb{R}^d \times \{\pm 1\}$ . Assume that all samples are such that  $\|\mathbf{x}_i\|_2 \leq 1$ . Then,*

$$\mathcal{R}(\text{RAMP} \circ \mathcal{H}_{1,0}, \mathcal{D}) \leq \sqrt{\frac{O(k \log d + B^2 \log d \log^2(m))}{m}}. \quad (22)$$

The proof is similar to that of Theorem 1 and is thus omitted here. In this case, (17) becomes

$$\ln \mathcal{N}(\epsilon/3, \mathcal{F}, L_2(S)) \leq \frac{CB^2 \log d}{\epsilon^2}, \quad (23)$$

using the following lemma, adapted from Lemma 19 in Bartlett and Mendelson (2002).

**Lemma 5.** *Let  $\mathbf{x} \in \mathbb{R}^d$  such that  $\|\mathbf{x}\|_1$ . Define*

$$\mathcal{F}_1 = \{\mathbf{x} \mapsto \langle \mathbf{w}, \mathbf{x} \rangle \mid \|\mathbf{w}\|_1 \leq B\}. \quad (24)$$

*Then, we have*

$$\mathcal{G}(\mathcal{F}, S) \leq CB \sqrt{\frac{\log d}{m}}, \quad (25)$$

*for some  $C > 0$ , where  $\mathcal{G}(\mathcal{F}, S)$  is the empirical Gaussian complexity, defined below (1).*

## References

- Peter Bartlett. Lecture notes. <https://people.eecs.berkeley.edu/~bartlett/courses/281b-sp06/lecture25.ps>, 2006.
- Peter L Bartlett and Shahar Mendelson. Rademacher and gaussian complexities: Risk bounds and structural results. *Journal of Machine Learning Research*, 3(Nov):463–482, 2002.
- Michel Ledoux and Michel Talagrand. *Probability in Banach spaces*. Springer, 1991.
- Shahar Mendelson. Rademacher averages and phase transitions in Glivenko-Cantelli classes. *IEEE transactions on Information Theory*, 48(1):251–263, 2002.
- David Pollard. *Convergence of stochastic processes*. Springer Science & Business Media, 2012.
- S. Sabato, N. Srebro, and Naftali Tishby. Distribution-dependent sample complexity of large margin learning. *The Journal of Machine Learning Research*, 14(1):2119–2149, 2013.
- Vladimir N. Sudakov. Gaussian random processes and solid angle measures in Hilbert space. *Doklady Akademii Nauk SSSR*, 197(1):43, 1971.
